# Supplementary material for: Unique molecular signature in mucolipidosis type IV microglia
Source: PubMed Central journal article supplement (PMC6935239; doi:10.1186/s12974-019-1672-4), 2019-12-28

Figure S1

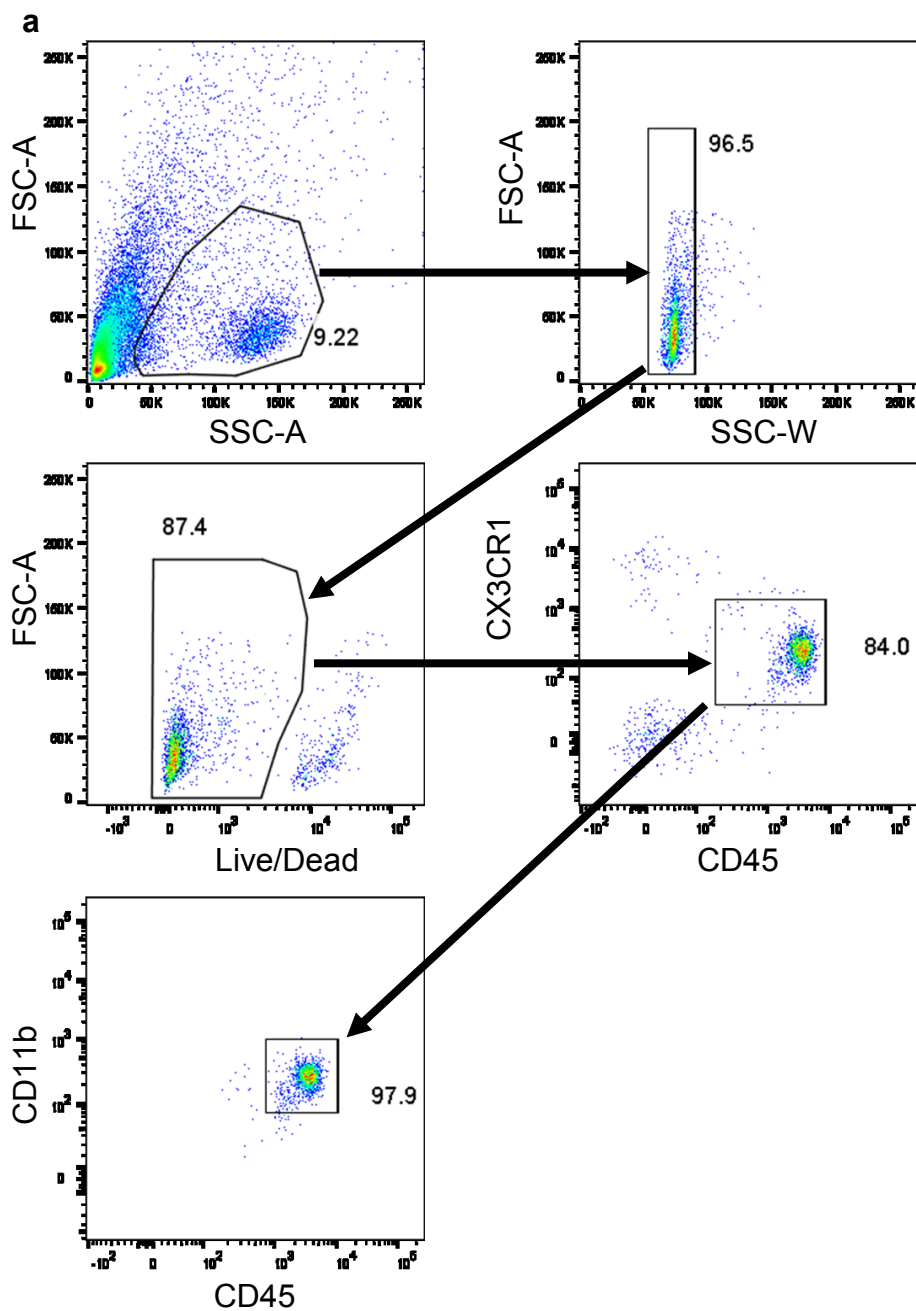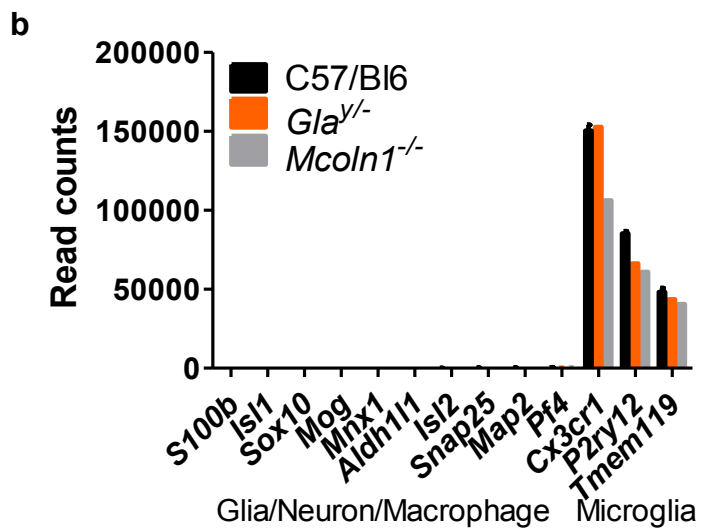

Supplement: 12974_2019_1672_MOESM1_ESM.pdf [file 12974_2019_1672_MOESM1_ESM.pdf]
